# Supplementary material
Source: publisher figshare collection journal article supplement (https://gsapubs.figshare.com/ndownloader/files/23302010)

## 1 SUPPLEMENTARY INFORMATION

### 2 Materials and Methods

3 Deep Sea Drilling Project (DSDP) Site 607 (41° 00.068'N, 32° 57.44'W) is  
4 situated at a depth of 3427 m on the upper western flank of the Mid-Atlantic  
5 Ridge (Fig. DR 7). Situated today in the core of North Atlantic Deepwater, this  
6 site was instrumental in the early studies examining Plio-Pleistocene ocean  
7 circulation (e.g., Raymo et al., 1990). Cores were sampled at a resolution of 5 to  
8 15 cm to obtain a time step of between 2 and 5 kyr spanning the entire MPT  
9 (~0.4-1.1 Ma). We use the age model of Lawrence et al. (2013), which is based on  
10 the oxygen isotope stratigraphy of Lisiecki and Raymo (2005). We measured  
11 new benthic foraminiferal stable isotopes in order to pair the values with trace  
12 metals analyses. To fill a stratigraphic gap, we used five sample residues from  
13 Site 607A to complete the trace metal records between 0.77 and 0.80 Ma  
14 (Lawrence, personal communication, 2015). For these five samples we used  
15 interpolated  $\delta^{18}\text{O}$  and  $\delta^{13}\text{C}$  values from Raymo et al. (1990). About 10 cm<sup>3</sup> of bulk  
16 sediment were oven-dried at 60°C, washed through a 63  $\mu\text{m}$  sieve, dried and dry-  
17 sieved into sub-fractions (63–125, 125–250, 250–500, >500  $\mu\text{m}$ ). In each  
18 fraction 800 grains (if present) were counted and various biogenic, clastic and  
19 authigenic components (among them radiolaria) differentiated to yield  
20 percentage composition of the sand fraction. Stable isotope analyses were  
21 conducted primarily on 1–3 *Cibicidoides wuellerstorfi* and *C. mundulus* picked  
22 from the >255  $\mu\text{m}$  fraction. *Cibicidoides* spp. are commonly integrated to  
23 reconstruct water mass properties (e.g., Mackensen and Bickert, 1999). In an  
24 effort to reduce the length of gaps in the upper section of the record, we also  
25 used *Oridorsalis umbonatus* (n=16), applying the published correction factors of  
26 +1.22 per mil for  $\delta^{13}\text{C}$  and -0.78 per mil for  $\delta^{18}\text{O}$  (Poirier and Billups, 2014). As  
27 discussed by Poirier and Billups (2014), this species has been used to augment  
28 stable isotope stratigraphies for the purpose of tracing water masses (Katz et al.,  
29 2003; Poli et al., 2000; Ferretti et al., 2005; Billups et al., 2011). All samples were  
30 further oven-dried for at least 24 hours prior to isotopic analysis. Analyses were  
31 performed at the University of Delaware using a GVI IsoPrime equipped with a  
32 Multiprep peripheral for the automated reaction of individual samples with

phosphoric acid (at 90°C). The values are reported versus Vienna PeeDee Belemnite using an in-house standard (Carrara Marble) and National Bureau of Standards-19. The  $\delta^{18}\text{O}$  record was adjusted for laboratory offsets by subtracting 0.4 per mil (Poirier and Billups, 2014). The analytical precision of the instrument is about 0.08 per mil for  $\delta^{18}\text{O}$  and 0.06 per mil for  $\delta^{13}\text{C}$  in the size range of 20-150  $\mu\text{g}$ .

For trace metal analyses, three species of benthic foraminifera (*Cibicidoides wuellerstorfi*, *Uvigerina* sp., and *Oridorsalis umbonatus*) were picked from the 250-355  $\mu\text{m}$  size fraction. Between 1 and 33 individuals were picked per sample, depending on abundance. There was no trend between the number of individuals analysed and measured values (DR Fig. 8). The samples were cleaned following the protocol of Boyle and Keigwin, (1985/86), which includes a reductive step. Between the clay removal and reductive steps the samples were examined under a binocular microscope, and non-carbonate particles were removed using a fine paintbrush (Barker et al., 2003). The redox sensitive uranium proxy measures the degree of authigenic coating on the exterior of the foraminiferal tests (Boiteau et al., 2012). Therefore, 40 individuals of the planktonic foraminifera *G. bulloides* (250-355  $\mu\text{m}$  size fraction) were prepared using a modified cleaning technique, which included the clay removal stage, but omitted both the oxidative and reductive cleaning stages. This resulted in significantly higher signal to noise in the U/Ca record compared to the full foraminiferal cleaning technique, which was used on the benthic samples (DR Fig. 2D). Samples were analysed for Cd/Ca, Mn/Ca, B/Ca, Al/Ca, Fe/Ca and U/Ca using matrix-matched standards on a Thermo Element XR ICP-MS at Cardiff University (long-term precision determined by analysing independent standards over the course of 2 years is better than 3% on all of these ratios (r.s.d.)).

### **Interpretation of $\delta^{13}\text{C}$ record**

DSDP Site 607  $\delta^{13}\text{C}$  record reflects a combination of many different factors, including global changes in whole ocean  $\delta^{13}\text{C}$ , the concentration of nutrients / respired organic carbon, and air-sea gas exchange. Following accepted paleoceanographic practice (e.g., Raymo et al., 1997) we remove the effects of changes in whole ocean  $\delta^{13}\text{C}$  by subtracting the Pacific  $\delta^{13}\text{C}$  record, although this

has the potential to introduce some inaccuracies due to miscorrelation on the sub-orbital-scale. We take this approach in Fig. 2, DR Fig. 4, and in calculating the air-sea exchange signal. We accomplished this by subtracting the Pacific Site 849 benthic  $\delta^{13}\text{C}$  record from the Atlantic Site 607  $\delta^{13}\text{C}$  record (both records having been synchronized via the Lisiecki and Raymo (2005)  $\delta^{18}\text{O}$  stack). We refer to this as the 'corrected 607  $\delta^{13}\text{C}$  record'. The trends observed in the 849  $\delta^{13}\text{C}$  record are offset from but similar to those at North Atlantic Site 552 (Raymo et al., 1997). Site 552 is situated at 2301 m water depth at  $56^\circ\text{N}$ , compared with Site 607's position at 3427 m water depth at  $41^\circ\text{N}$ . It therefore seems likely that Site 552 was more consistently bathed by a northern source water mass, and that the similar trends in the Site 849 and Site 552 records represent changes in whole ocean  $\delta^{13}\text{C}$ , rather than the changing water mass mixing signal observed at Site 607 (Raymo et al., 1997). The changes in whole ocean  $\delta^{13}\text{C}$  are likely dominated by changes in the terrestrial biosphere (Raymo et al., 1997), although they may contain an air-sea exchange component themselves.

## **Interpretation of Cd/Ca record**

Previous work implies a lack of consistent benthic foraminiferal interspecies offsets for Cd/Ca (Boyle, 1988; Boyle, 1992), although within a global compilation, the 1:1 relationship between species breaks down at a handful of sites (Boyle, 1992). There are no apparent interspecies offsets for Cd/Ca in our records (DR Fig. 1A), consistent with previous work (Fig. DR 9). We analysed co-existing *Uvigerina* and *C. wuellerstorfi* in 35 samples, the mean *Uvigerina*-*C. wuellerstorfi* offset was  $-0.008\ \mu\text{mol/mol}$  (2 s.e. =  $0.006\ \mu\text{mol/mol}$ ). We analysed co-existing *Uvigerina* and *O. umbonatus* in 41 samples, the mean *Uvigerina*-*O. umbonatus* offset was  $-0.010\ \mu\text{mol/mol}$  (2 s.e. =  $0.03\ \mu\text{mol/mol}$ ). We analysed co-existing *O. umbonatus* and *C. wuellerstorfi* in 39 samples, the mean *O. umbonatus*-*C. wuellerstorfi* offset was  $0.0003\ \mu\text{mol/mol}$  (2 s.e. =  $0.007\ \mu\text{mol/mol}$ ). This suggests there are very small, or no, consistent interspecies offset in Cd/Ca in our records. We therefore compile the Cd/Ca data into one record without using interspecies offsets. We use the deep-water cadmium partition coefficient ( $D_{\text{Cd}}$ ) of 2.9 to calculate seawater [Cd] (Boyle, 1988), assuming seawater [Ca] is 0.01 mol/kg (Equation 1).

99  $D_{Cd} = (Cd/Ca)_{foram} / Cd/Ca_{water}$  (Equation 1)

100 We then use the Atlantic Cd/Ca-PO<sub>4</sub> relationship ( $\alpha=2.5$ ) to calculate seawater  
101 [PO<sub>4</sub>] (Equation 2) (Elderfield and Rickaby, 2000) (Fig. 1C).

102  $Cd_{sw} = Cd_T / \{ \alpha_{Cd/P} (P_T/P_{sw} - 1) + 1 \}$  (Equation 2)

103 Where  $Cd_{sw}$  is calculated using equation 1,  $Cd_T$  is 1.2 nmol/kg,  $\alpha_{Cd/P}$  is 2.5,  $P_T$  is  
104 3.3  $\mu\text{mol/kg}$  and  $P_{sw}$  is seawater [PO<sub>4</sub>] (Elderfield and Rickaby, 2000).

105 Replicate analyses of samples containing between 4 and 20 individual benthic  
106 foraminifera produced a pooled standard deviation of 0.007  $\mu\text{mol/mol}$  (Bryan  
107 and Marchitto, 2010). Assuming this variability is similar to our samples, this  
108 would correspond to an uncertainty of  $\pm 0.17 \mu\text{mol/kg}$  [PO<sub>4</sub>] for our mean Cd/Ca  
109 value ( $\pm 2$  s.d.). We therefore display a  $\pm 0.17 \mu\text{mol/kg}$  uncertainty window in  
110 Figure 1C. The implied assumption of constant oceanic Cd/Ca should not  
111 significantly affect the trends in our record, because although the residence time  
112 of Cd in seawater is around  $10^5$  years, the Cd inventory appears relatively  
113 constant through time (Delaney and Boyle, 1987). In the absence of air-sea  
114 exchange effects, a 1  $\mu\text{mol/kg}$  increase in [PO<sub>4</sub>] would be expected to be  
115 associated with a 1.1‰ decrease in  $\delta^{13}\text{C}$  (Broecker and Maier-Reimer, 1992). We  
116 therefore use the [PO<sub>4</sub>] record (Fig. 1C) to calculate the ‘Cd/Ca-predicted  $\delta^{13}\text{C}$ ’  
117 using equation (3) (DR Fig. 4):

118  
119  $\delta^{13}\text{C}_{predicted} = \delta^{13}\text{C}_{mean} - ([\text{PO}_4] - [\text{PO}_4]_{mean}) * 1.1$   
120 (Equation 3)

121 Where  $\delta^{13}\text{C}_{mean}$  is the mean of our corrected *Cibicidoides* sp.  $\delta^{13}\text{C}$  record (0.64  
122 ‰) and  $[\text{PO}_4]_{mean}$  is the mean of our [PO<sub>4</sub>] record (1.6  $\mu\text{mol/kg}$ ).

### 123 Interpretation of B/Ca record

124 To generate a bottom water record of carbonate saturation state ( $\Delta\text{CO}_3^{=}$ ), we use  
125 the B/Ca record of the epifaunal foraminifera *C. wuellerstorfi* (DR Fig. 1B), as this  
126 species will not be affected by porewater buffering processes (Elderfield et al.,

2010). We use the modern empirical calibration determined on this species (Yu and Elderfield, 2007) to calculate changes in  $\Delta\text{CO}_3^{2-}$  (Fig. 1D) (equation 4). The implied assumption of constant oceanic B/Ca should not significantly affect the trends in our record, because the residence times of B and Ca in seawater are  $\sim 10^7$  and  $10^6$  years respectively (Broecker and Peng, 1982).

$$\text{B/Ca}_{\text{C.wuellerstorfi}} = 1.14 \times \Delta\text{CO}_3^{2-} + 177.1 \quad (\text{Equation 4})$$

We use the bottom water  $[\Delta\text{CO}_3^{2-}]$  record (Fig. 1D) and the  $\delta^{13}\text{C}$ - $[\Delta\text{CO}_3^{2-}]$  Redfield relationship calculated in Yu et al., (2008) to calculate the 'B/Ca-predicted  $\delta^{13}\text{C}$ ' (equation 5) (DR Fig. 4):

$$\delta^{13}\text{C}_{\text{predicted}} = \delta^{13}\text{C}_{\text{mean}} + ([\Delta\text{CO}_3^{2-}] - [\Delta\text{CO}_3^{2-}]_{\text{mean}}) \times 1/43 \quad (\text{Equation 5})$$

Where  $\delta^{13}\text{C}_{\text{mean}}$  is the mean of our corrected *Cibicidoides* sp.  $\delta^{13}\text{C}$  record (0.64 ‰) and  $[\Delta\text{CO}_3^{2-}]_{\text{mean}}$  is the mean of our  $[\Delta\text{CO}_3^{2-}]$  record (24  $\mu\text{mol/kg}$ ).

### Interpretation of U/Ca records

Our foraminiferal U/Ca record reflects the amount of authigenic coatings on foraminiferal tests, which in turn reflects redox conditions in the sediment pore waters (Jaccard et al., 2009). Several factors can impact pore water redox conditions, including organic matter flux, sedimentation rate and bottom water  $[\text{O}_2]$ . Our U/Ca record correlates well with the alkenone mass accumulation record at the same site (Lawrence et al., 2013) (DR Fig. 2A). The mass accumulation rate of organic matter in the sediment column could be interpreted as a 'production' or 'preservation' feature (with preservation being favored when the site is bathed by a poorly ventilated water mass). However, the abundance of alkenones in the sediment column at Site 607 has been argued to reflect productivity changes in the overlying waters, (Lawrence et al., 2013). The similarity between our U/Ca record, the alkenone mass accumulation rate record and the abundance of radiolaria (DR Fig. 2) therefore suggests that the U/Ca

record is most likely dominated by a local productivity signal. If these changes in productivity caused significant shifts in the concentration of remineralised organic matter at the seafloor, they could impact benthic foraminiferal Cd/Ca records. However, maxima in U/Ca (and hence productivity) are not associated with maxima in Cd/Ca (DR Fig. 2C). While we acknowledge that both the U/Ca and Cd/Ca records are impacted by multiple processes, we therefore make the assumption that the Cd/Ca record is not dominated by local changes in productivity, and hence we interpret this record in terms of nutrient concentration of the bottom water mass.

#### **Foraminiferal Mn/Ca as an indicator of contamination on Cd/Ca**

Foraminiferal tests can become coated with oxide phases rich in both Mn and Cd, so elevated Mn/Ca ratios have been used to exclude potentially contaminated Cd/Ca data (Boyle, 1983). However, all the benthic foraminiferal samples analysed here were subjected to the full cleaning technique, which includes a reductive step to remove oxide coatings (Boyle and Keigwin, 1985/86). The three benthic foraminiferal species analysed here have clear interspecies offsets for Mn/Ca, but not for Cd/Ca (DR Fig. 5). Furthermore, there is no correlation between benthic foraminiferal Mn/Ca and Cd/Ca (DR Fig. 6). It is therefore difficult to envision how the Mn/Ca records could reflect the degree of oxide coatings. Instead we propose that the measured Mn reflects Mn incorporated into the foraminiferal calcite during the precipitation process. While this is likely related to sediment redox conditions it does not appear to reflect a contaminant rich in Cd.

## 183    **Supplementary References**

- 184    Billups, K., Rabideaux, N., and Stoffel, J., 2011, Suborbital-scale surface and deep  
185    water records in the subtropical North Atlantic: Implications on thermohaline  
186    overturn, *Quat. Sci. Rev.*, v. 30, p. 2976–2987.
- 187    Boyle, E.A., 1988, Cadmium: Chemical tracer of deepwater paleoceanography,  
188    *Paleoceanography*, v. 3, p. 471-489, doi: 10.1029/PA003i004p00471.
- 189    Broecker, W.S. and Peng, T.-H., 1982, *Tracers in the Sea*, Columbia University,  
190    Palisades, New York.
- 191    Bryan, S.P. and Marchitto, T.M., 2010, Testing the utility of paleonutrient proxies  
192    Cd/Ca and Zn/Ca in benthic foraminifera from thermocline waters,  
193    *Geochemistry, Geophysics, Geosystems*, 11, doi:10.1029/2009GC002780.
- 194    Delaney, M.L. and Boyle, E.A., 1987, Cd/Ca in late Miocene benthic foraminifera  
195    and changes in the global organic carbon budget, *Nature*, v. 330, p. 156-159.
- 196    Elderfield, H., and Rickaby, R.E.M., 2000, Oceanic Cd/P ratio and nutrient  
197    utilization in the glacial Southern Ocean, *Nature*, 405, 305-310.
- 198    Ferretti, P., Shackleton, N.J., Rio, D. and Hall, M.A., 2005, Early-Middle Pleistocene  
199    deep circulation in the western subtropical Atlantic: Southern Hemisphere  
200    modulation of the North Atlantic Ocean, in *Early-Middle Pleistocene Transitions:*  
201    *The Land Ocean Evidence*, v. 247, Ed. M. J. Head and P. L. Gibbard, p. 131–145,  
202    The Geol. Soc., London, U. K.
- 203    Katz, M.E., Katz, D.R., Wright, J.D., Miller, K.G., Pak, D.K., Shackleton, N.J., and  
204    Thomas, E., 2003, Early Cenozoic benthic foraminiferal isotopes: Species  
205    reliability and interspecies correction factors, *Paleoceanography*, v. 18, 1024,  
206    doi:10.1029/2002PA000798.
- 207    Mackensen, A. and Bickert, T., 1999, Stable carbon isotopes in benthic  
208    foraminifera: Proxies for deep and bottom water circulation and new production,  
209    *In: Fischer, G. and Wefer, G. (Eds.), Use of proxies in paleoceanography: Examples*  
210    *from the South Atlantic*, Springer-Verlag, Berlin Heidelberg, p. 229-254.

211 Poli, M.S., Thunell, R.C. and Rio, D., 2000, Millennial-scale changes in North Atlantic  
 212 Deep Water circulation during marine isotope stage 11 and 12: Linkage to  
 213 Antarctic climate, *Geology*, v. 28, p. 807-810.

214

# 215 Data Repository Figure 1

216 (A) *Cibicidoides* sp.  $\delta^{13}\text{C}$  (gray line) and benthic foraminiferal Cd/Ca from three  
 217 species. The green line depicts the mean Cd/Ca of each sample. Error bars show  
 218 analytical precision for Cd/Ca (r.s.d. = 2.7%) (B) *Cibicidoides* sp.  $\delta^{13}\text{C}$  (gray line)  
 219 and *C. wuellerstorfi* B/Ca (purple diamonds). Error bars show analytical  
 220 precision for B/Ca (r.s.d. = 2.6%).

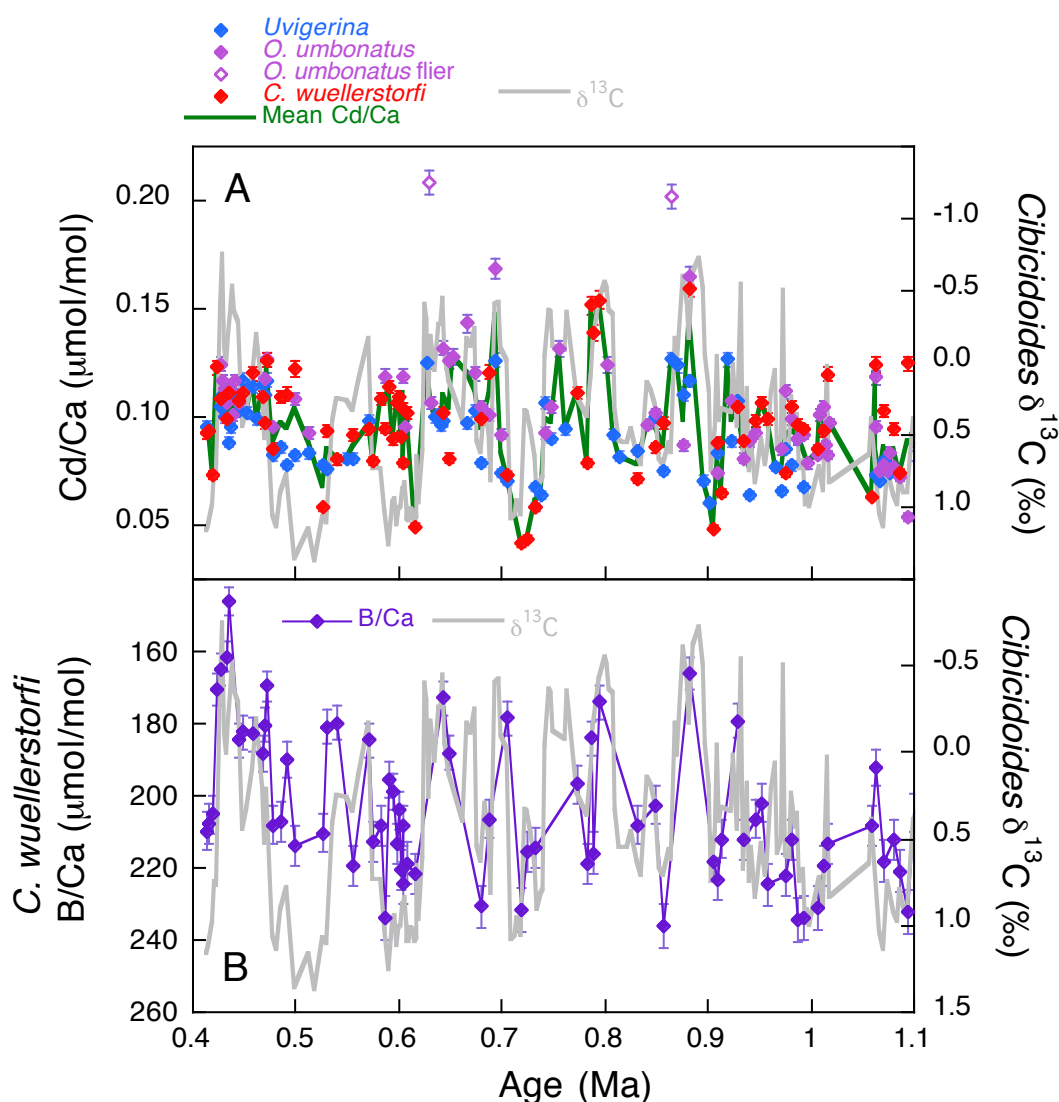

221



**Data Repository Figure 2** (A) DSDP Site 607 *G. bulloides* U/Ca (this study) and alkenone mass accumulation rates (Lawrence et al., 2013). (B) *G. bulloides* U/Ca and % abundance of radiolaria in the >63 $\mu$ m sediment size fraction. (C) *G. bulloides* U/Ca and mean Cd/Ca of the 3 benthic foraminiferal species analysed. (D) Foraminiferal U/Ca. The *G. bulloides* samples were subjected to the clay removal step only, the benthic species were subjected to the full cleaning, including the oxidizing and reducing steps. Gray bars highlight the timing of marine isotope stages (MIS) after Lisiecki and Raymo (2005).

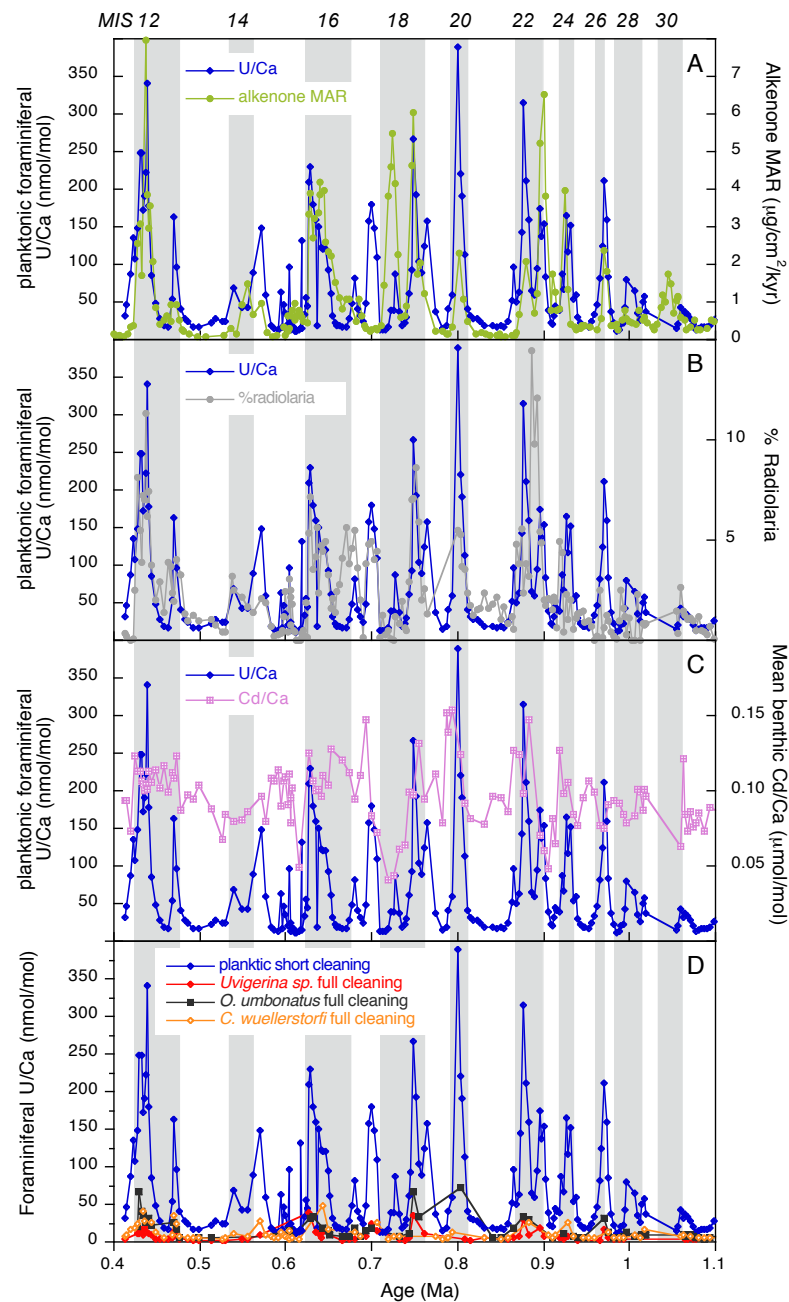

**Data Repository Figure 3** Corrected  $\delta^{13}\text{C}$  (Deep Sea Drilling Project Site 607  $\delta^{13}\text{C}$  minus ODP Site 849  $\delta^{13}\text{C}$ ) versus (A) reconstructed bottom water  $[\text{PO}_4]$  and (B) reconstructed carbonate saturation state ( $\Delta\text{CO}_3^{2-}$ ) for glacial intervals only between MIS 30 and 22 based on the timings provided in Lisiecki and Raymo (2005). The “biology” arrow in A shows expected trendlines caused by changes in concentration of respired organic matter, based on modern Redfield ratios and carbon isotopic composition of organic matter (Lynch-Stieglitz et al., 1995). Horizontal arrow indicates that changes in air-sea  $\text{CO}_2$  exchange will not impact  $[\text{PO}_4]$ . The slopes of the corresponding arrows in panel B are from Yu et al., (2008). The green circles represent the composition of modern Antarctic Bottom Water (AABW) and North Atlantic Deep Water (NADW).

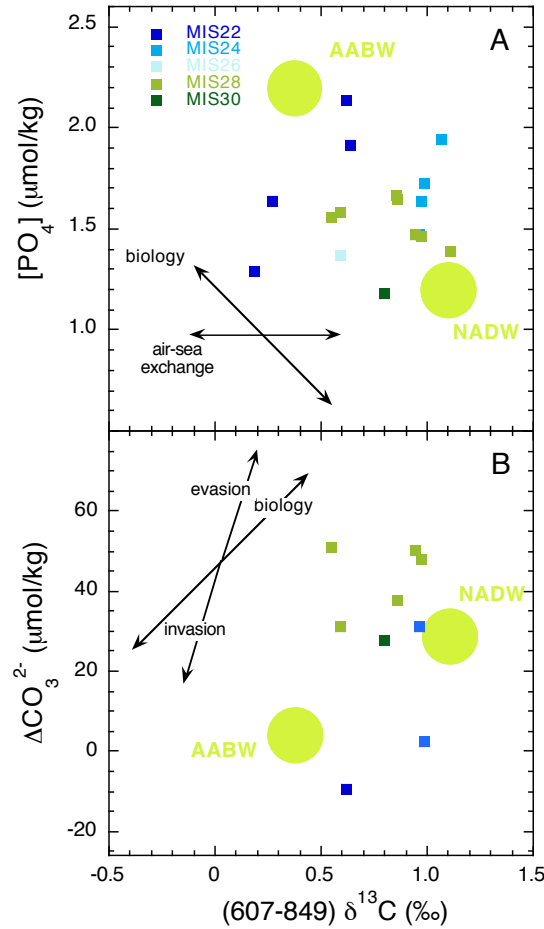

**Data Repository Figure 4**

Predicted  $\delta^{13}\text{C}$  calculated assuming the record is controlled solely by biological effects, based on (A) the Cd/Ca record and (B) the B/Ca record, compared with the corrected  $\delta^{13}\text{C}$  record (Site 607  $\delta^{13}\text{C}$  minus Pacific Site 849  $\delta^{13}\text{C}$ ). Pale green envelope represents the uncertainty associated with the  $[\text{PO}_4]$  reconstruction (see DR for details), Pale brown envelope represents the uncertainty associated with the  $\Delta\text{CO}_3^{2-}$  reconstruction (see DR for details). Major discrepancies between the two records in panel A point to air-sea gas exchange effects (see text for detail).

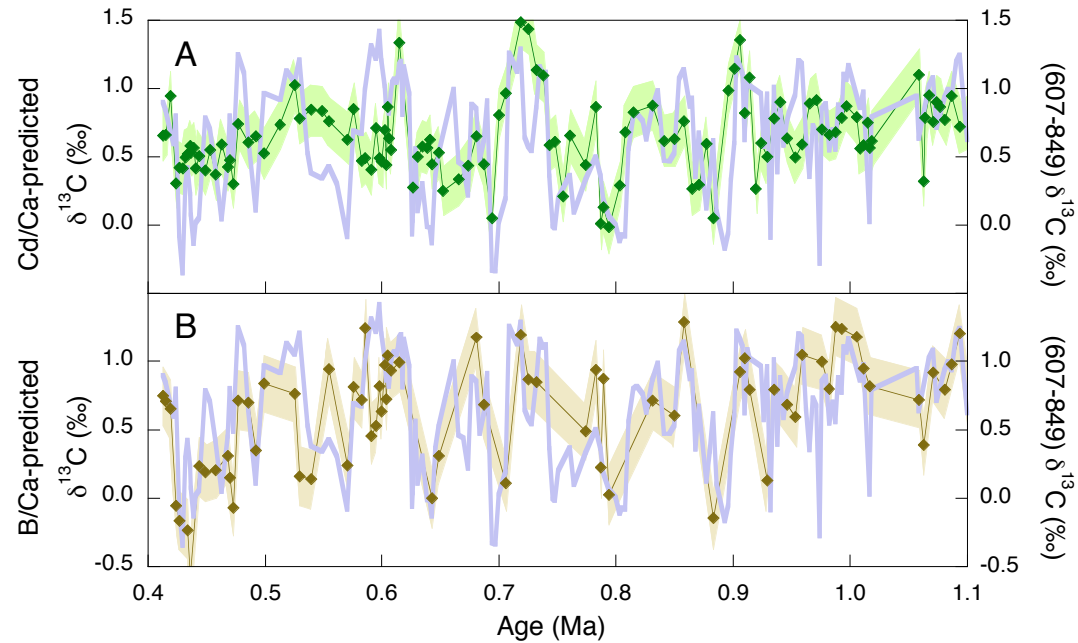

**Data Repository Figure 5**

(A) Benthic foraminiferal Mn/Ca and (B) benthic foraminiferal Cd/Ca records from DSDP Site 607. Blue diamonds are *Uvigerina* sp., gray circles are *Oridorsalis umbonatus* and purple squares are *Cibicidoides wuellerstorfi*. The two fliers in panel B are not used to calculate seawater [PO<sub>4</sub>] in Figure 1.

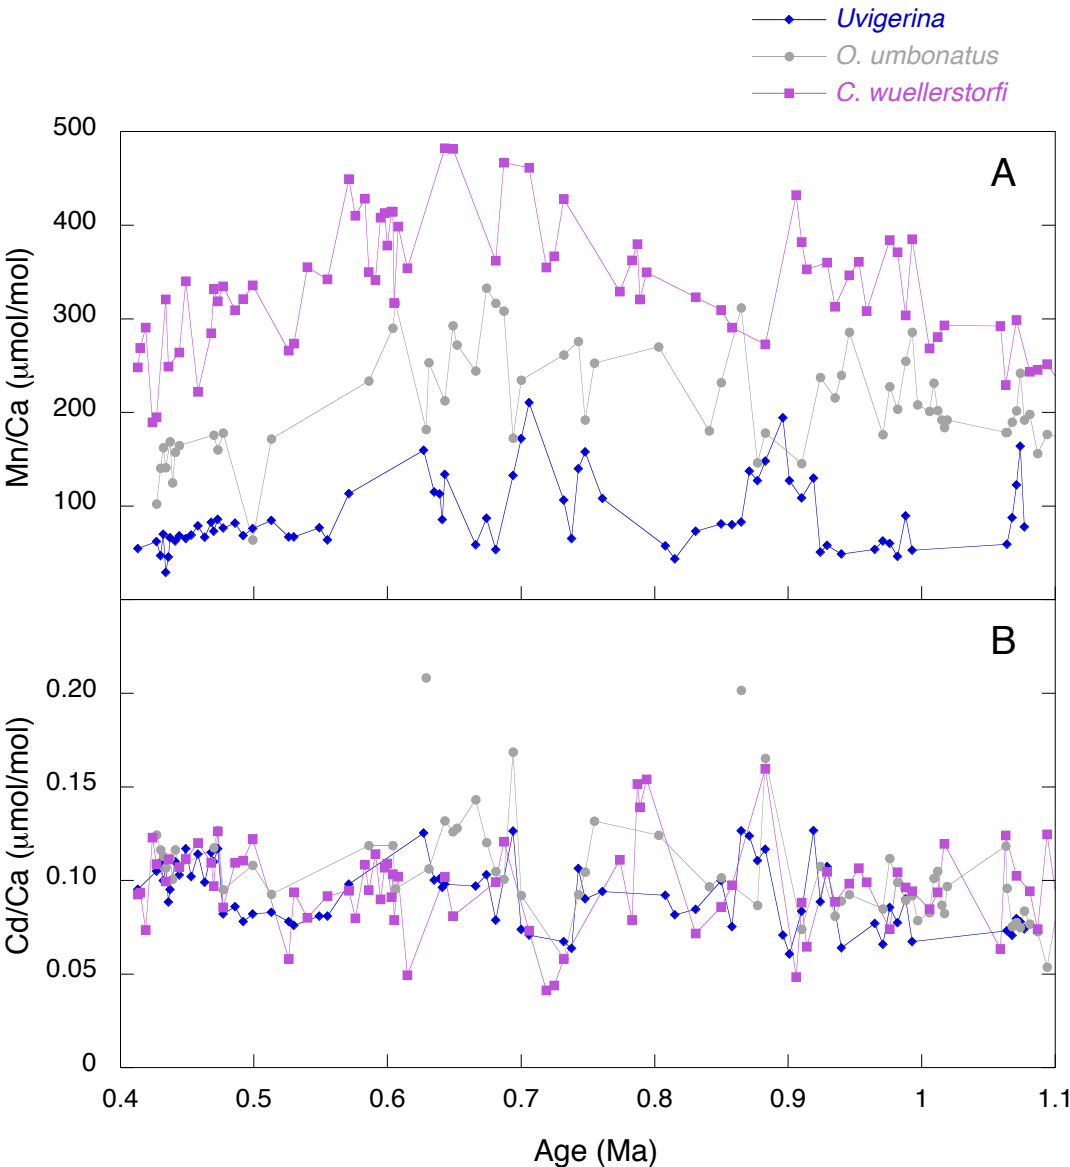

295

296 **Data Repository Figure 6**

297 DSDP Site 607 Benthic foraminiferal Mn/Ca vs Cd/Ca for *Uvigerina sp.* (blue  
298 diamonds), *O. umbonatus* (gray circles) and *C. wuellerstorfi* (purple squares).

299

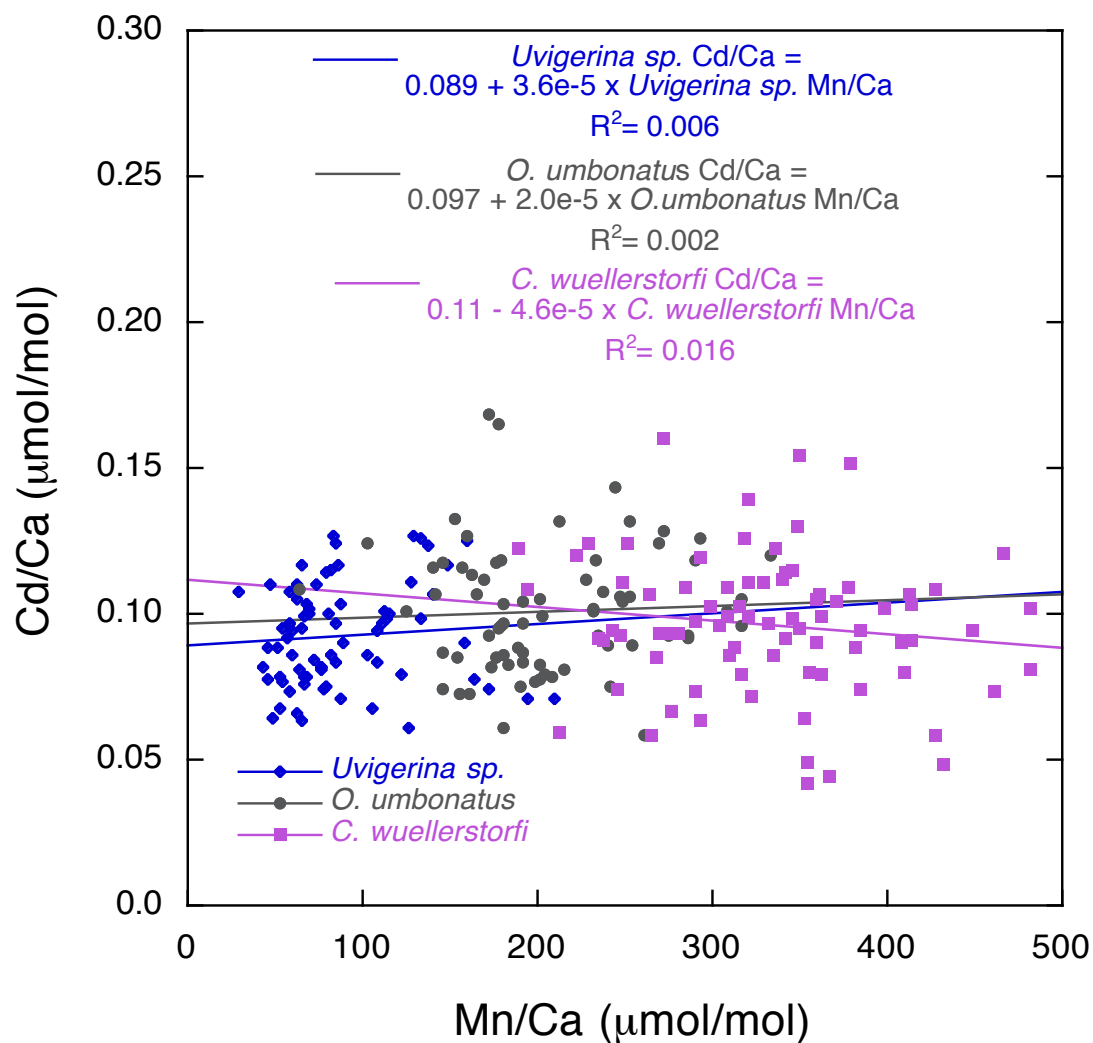

300

301

302

303

304

**Data Repository Figure 7**

Location Map of DSDP Site 607, underlying bathymetry is from the British Oceanographic Data Centre.

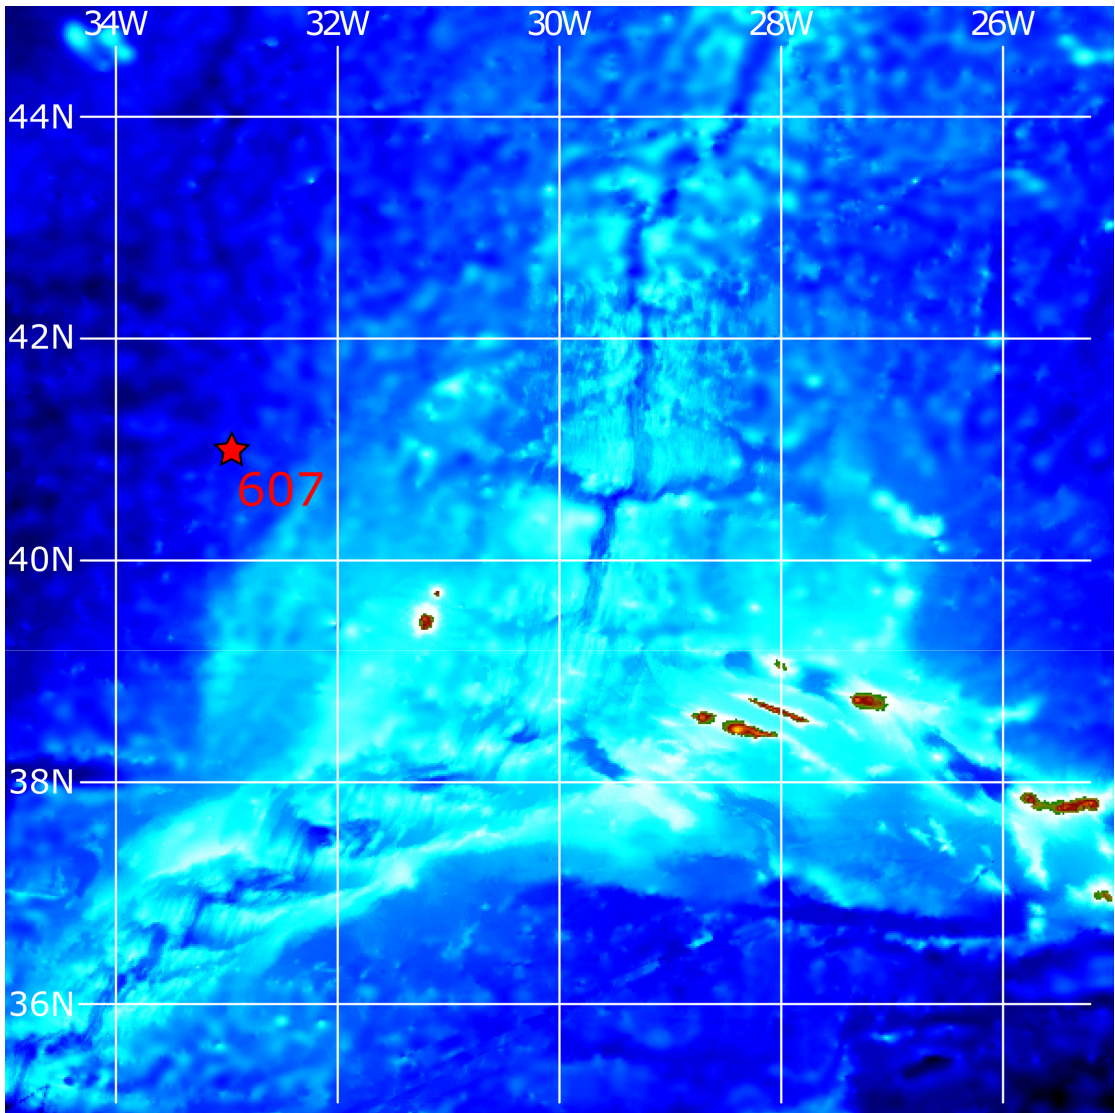

**Data Repository Figure 8**

(A) *C. wuellerstorfi* B/Ca vs number of individual specimens per analysis, (B),  
Benthic foraminiferal Cd/Ca vs number of individual specimens per analysis,  
*Uvigerina* sp. (blue), *C. wuellerstorfi* (red) and *O. umbonatus* (gray).

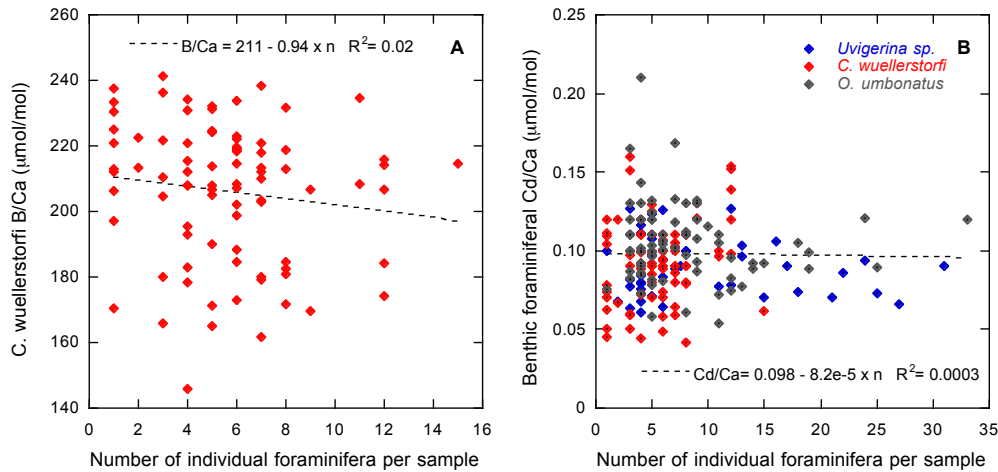

**Data Repository Figure 9**

*C. wuellerstorfi* and *O. umbonatus* Cd/Ca versus *Uvigerina* Cd/Ca. Closed squares from Boyle (1988) and Boyle (1992), open circles, this study.

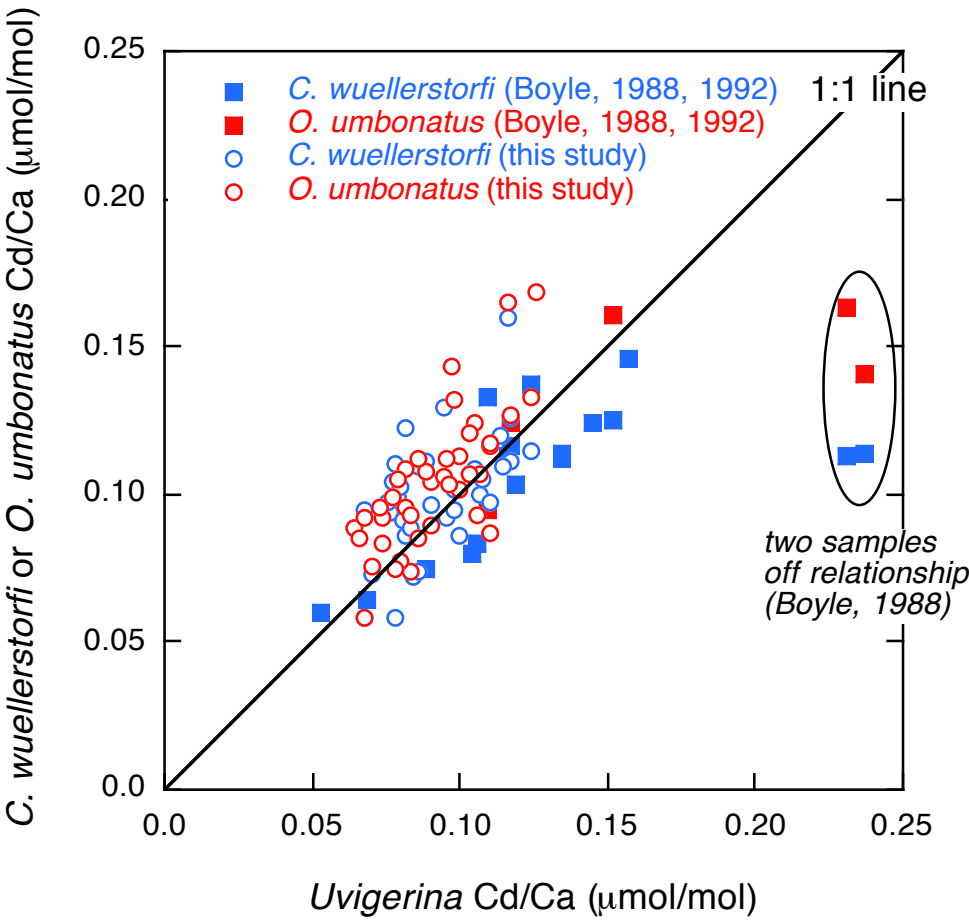

Supplement: Supplementary file 1 [file 23302010]
